# Supplementary material for: Respiratory weakness after mechanical ventilation is associated with one-year mortality - a prospective study
Source: Springer Nature journal article supplement (doi:10.1186/s13054-016-1418-y), 2016-07-29

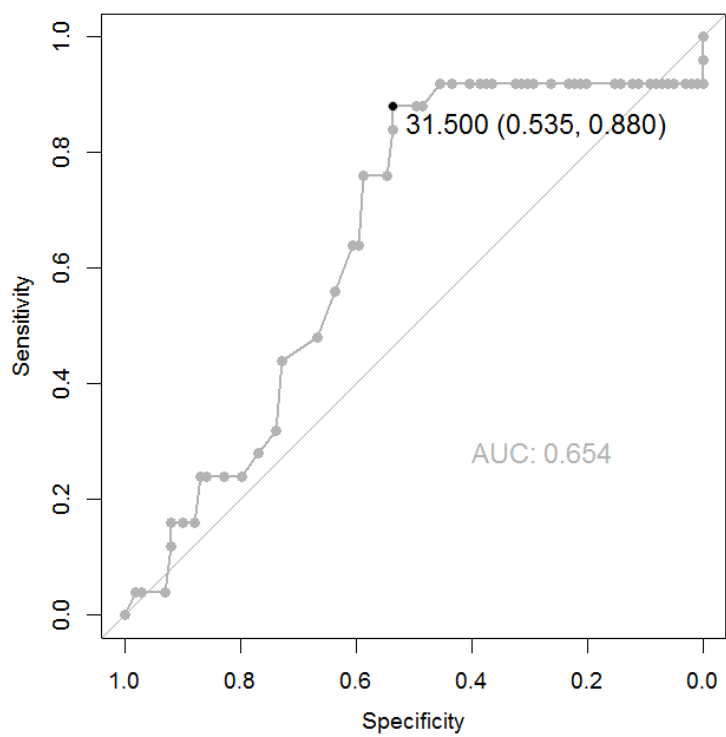

Supplement: MOESM1 [file 10549550]
